# Supplementary material
Source: PubMed Central journal article supplement (PMC6779371)
Supplement: ASN.2018101067SupplementaryData.pdf [file ASN.2018101067SupplementaryData.pdf]

## SUPPLEMENTAL MATERIALS

### CONTENTS

**Supplemental Table1.** Primer sets used for real-time reverse transcription-polymerase chain reaction

**Supplemental Figure 1.** Flow cytometric gating strategies for various leukocyte populations in the spleen and kidneys.

**Supplemental Figure 2.** Adoptively-transferred regulatory B cells were found in the spleen and kidneys after IRI.

**Supplemental Figure 3.** Impact of Treg depletion on the renoprotective effects of Breg transfer against IRI.

**Supplemental Figure 4.** Comparison of the renoprotective effects of anti-CD45RB and anti-Tim-1 treatment against renal IRI.

**Supplemental Figure 5.** Flow cytometric diagrams for regulatory B cells and depletion of B or T cells.

**Supplemental Figure 6.** Renal infiltration of regulatory B cells after IRI.

**Supplemental Figure 7.** Role of immunosuppressive molecules of regulatory B cells in the renoprotective effects of anti-CD45RB treatment against IRI.

**Supplemental Table1.** Primer sets used for real-time reverse transcription-polymerase chain reaction

| Gene          | Primer sequence (5'-3')  | Annealing temperature (°C) |
|---------------|--------------------------|----------------------------|
| IL-1 $\beta$  | F: ACTCATTGTGGCTGTGGAGA  | 60                         |
|               | R: TTGTTTCATCTCGGAGCCTGT |                            |
| IL-6          | F: CTGGGGATGTCTGTAGCTCA  | 60                         |
|               | R: CTGTGAAGTCTCCTCTCCGG  |                            |
| MCP-1         | F: AGGTGTCCCAAAGAAGCTGT  | 60                         |
|               | R: ACAGAAGTGCTTGAGGTGGT  |                            |
| IFN- $\gamma$ | F: GATTGCGGGGTTGTATCTGG  | 60                         |
|               | R: GCTTTCTTTCAGGGACAGCC  |                            |
| IL-17A        | F: ACTCTCCACCGCAATGAAGA  | 60                         |
|               | R: CTCTCAGGCTCCCTCTTCAG  |                            |
| IL-10         | F: GGTGAGAAGCTGAAGACCCT  | 60                         |
|               | R: TGTCTAGGTCCTGGAGTCCA  |                            |
| GAPDH         | F: CAACTCCCCTCTTCCACCT   | 60                         |
|               | R: GAGTTGGGATAGGGCCTCTC  |                            |

F, forward; IFN- $\gamma$ , interferon- $\gamma$ ; IL-1 $\beta$ , interleukin-1 $\beta$ ; IL-6, interleukin-6; IL-10, interleukin-10; IL-17, interleukin-17; MCP-1, monocyte chemoattractant protein-1; R, reverse

## SUPPLEMENTAL FIGURE LEGENDS

**Supplemental Figure 1.** Flow cytometric gating strategies for various leukocyte populations in the spleen and kidneys. (A) Gating strategies for live, singlet leukocytes in the spleen and kidneys. (B) Flow cytometry 2-dimensional diagrams for Foxp3<sup>+</sup>CD4<sup>+</sup> regulatory T cells and Tim-1<sup>+</sup>CD19<sup>+</sup> regulatory B cells, Gr-1<sup>+</sup> neutrophils, and F4/80<sup>+</sup> macrophages in the spleen and kidneys. 7-AAD, 7-Amino Actinomycin D; FSC, forward scatter; PBS, phosphate-buffered saline; SSC, side scatter.

**Supplemental Figure 2.** Adoptively-transferred regulatory B cells were found in the spleen and kidneys after IRI. (A) Sorted CD45.1<sup>+</sup>Tim-1<sup>+</sup>CD19<sup>+</sup> Breg cells were transferred to CD45.2<sup>+</sup> mice 1 day prior to IRI. When mice were harvested 1 day after IRI, transferred CD45.1<sup>+</sup> Bregs were found in the spleen and kidneys. (B-C) Proportions (B) and numbers (C) of transferred CD45.1<sup>+</sup> Bregs in the spleen and kidneys. Results were expressed as dot plots with the mean ± standard error of the mean. N = 3. \*P<0.05, \*\*P<0.01 compared to the PBS control group. Breg, regulatory B cell; PBS, phosphate-buffered saline.

**Supplemental Figure 3.** Impact of Treg depletion on the renoprotective effects of Breg transfer against IRI. (A) Depleting anti-CD25 was administered to mice where Bregs or PBS were transferred prior to IRI; mice were harvested 1 day after IRI. (B) Levels of serum creatinine and BUN after IRI. (C) Proportions of splenic and renal CD4<sup>+</sup>Foxp3<sup>+</sup> Tregs after IRI. (D) Proportions of splenic and renal Tim-1<sup>+</sup>CD19<sup>+</sup> or IL-10<sup>+</sup>CD19<sup>+</sup> Bregs after IRI. Results were expressed as dot plots with the mean ± standard error of the mean. N = 3–9. \*P<0.05, \*\*P<0.01 comparison between the PBS control group and the anti-CD45RB group. #P<0.05, ##P<0.01,

comparison between the PBS/anti-CD25 group and the anti-CD45RB/anti-CD25 group. Bregs, regulatory B cells; BUN, blood urea nitrogen; IRI, ischemia-reperfusion injury; PBS, phosphate-buffered saline; Tregs, regulatory T cells; WT, wild-type.

**Supplemental Figure 4.** Comparison of the renoprotective effects of anti-CD45RB and anti-Tim-1 treatment against renal IRI. (A) Anti-CD45RB, anti-Tim-1 or PBS was administered to WT mice 1 day prior to IRI; mice were harvested 1 day after IRI. (B) Levels of serum creatinine and BUN after IRI. (C) Flow cytometry analysis of splenic Bregs and Tregs after IRI. (D) Flow cytometry analysis of renal Bregs and Tregs after IRI. Results were expressed as dot plots with the mean  $\pm$  standard error of the mean. N = 3–5. \*P<0.05, \*\*P<0.01 compared to the PBS control group. #P<0.05, comparison between the anti-CD45RB group and the anti-Tim-1 group. Bregs, regulatory B cells; BUN, blood urea nitrogen; IRI, ischemia-reperfusion injury; PBS, phosphate-buffered saline; Tregs, regulatory T cells; WT, wild-type.

**Supplemental Figure 5.** Flow cytometric diagrams for regulatory B cells and depletion of B or T cells. (A) Flow cytometric diagrams for Tim-1<sup>+</sup>CD19<sup>+</sup> Bregs in the spleen and the kidney 1 day after IRI. (B) Flow cytometric diagrams for IL-10<sup>+</sup>CD19<sup>+</sup> Bregs in the spleen and the kidney 1 day after IRI. (C) Treatment of anti-CD4 and anti-CD8 nearly completely depleted both CD4<sup>+</sup> and CD8<sup>+</sup> T cells in the spleen. (D) Anti-CD20 treatment depleted splenic CD19<sup>+</sup> B cells effectively. Results were expressed as dot plots with the mean  $\pm$  standard error of the mean. N = 3–9, \*P<0.05, \*\*P<0.01 compared to the PBS control group. #P<0.05, anti-CD45RB group compared to the anti-CD45RB/anti-Tim-1 group. Bregs, regulatory B cells; IRI, ischemia-reperfusion injury; PBS, phosphate-buffered saline.

**Supplemental Figure 6.** Renal infiltration of regulatory B cells after IRI. Anti-CD45RB or PBS was administered to WT mice 1 day prior to IRI; mice were harvested 1 day after IRI. Representative immunofluorescence images for renal infiltration of Tim-1<sup>+</sup>CD19<sup>+</sup> Bregs in the sham, PBS, and anti-CD45 groups. Magnification ×200; magnification in right-upper quadrant of merge views ×400. Bregs, regulatory B cells; DAPI, 4',6-diamidino-2-phenylindole; IRI, ischemia-reperfusion injury; PBS, phosphate-buffered saline; WT, wild-type.

**Supplemental Figure 7.** Role of immunosuppressive molecules of regulatory B cells in the renoprotective effects of anti-CD45RB treatment against IRI. (A) Role of TGF- $\beta$  of B cells in the renoprotective effects of anti-CD45RB treatment against IRI. First, LAP expression in the splenic and renal B cells after IRI was assessed. Next, anti-TGF- $\beta$  antibody was administered to WT mice with anti-CD45RB or PBS 1 day prior to IRI; mice were harvested on 1 day after IRI. Then, levels of serum creatinine and BUN were assessed along with proportions of splenic and renal Bregs. (B) Role of IDO of B cells in the renoprotective effects of anti-CD45RB treatment against IRI. First, IDO expression in the splenic and renal B cells after IRI was assessed. Next, B cells sorted from IDO KO mice were transferred to RAG1 KO mice 2 weeks before IRI. Anti-CD45RB or PBS was administered to RAG1 KO mice with transferred IDO-deficient B cells 1 day prior to IRI; mice were harvested on 1 day after IRI. Then, levels of serum creatinine and BUN were assessed along with proportions of splenic and renal Bregs. (C-E) Changes in expression of PD-L1 (C), FasL (D), and IL-35 (IL-12 $\alpha$ , Ebi3) (E) in the splenic and renal B cells in response to anti-CD45RB treatment in IRI. Results were expressed as dot plots with the mean  $\pm$  standard error of the mean. N = 4–6. \*P<0.05, \*\*P<0.01 compared to the PBS control group. #P<0.05, comparison between the PBS/anti-TGF- $\beta$  group and anti-

CD45RB/anti-TGF- $\beta$  group. Bregs, regulatory B cells; BUN, blood urea nitrogen; FasL, Fas ligand; IDO, indoleamine-pyrrole 2,3-dioxygenase; IRI, ischemia-reperfusion injury; KO, knock out; LAP, latency associated peptide; PBS, phosphate-buffered saline; PD-L1, programmed death-ligand 1; RAG1, recombination activating gene 1; TGF, transforming growth factor; WT, wild-type.

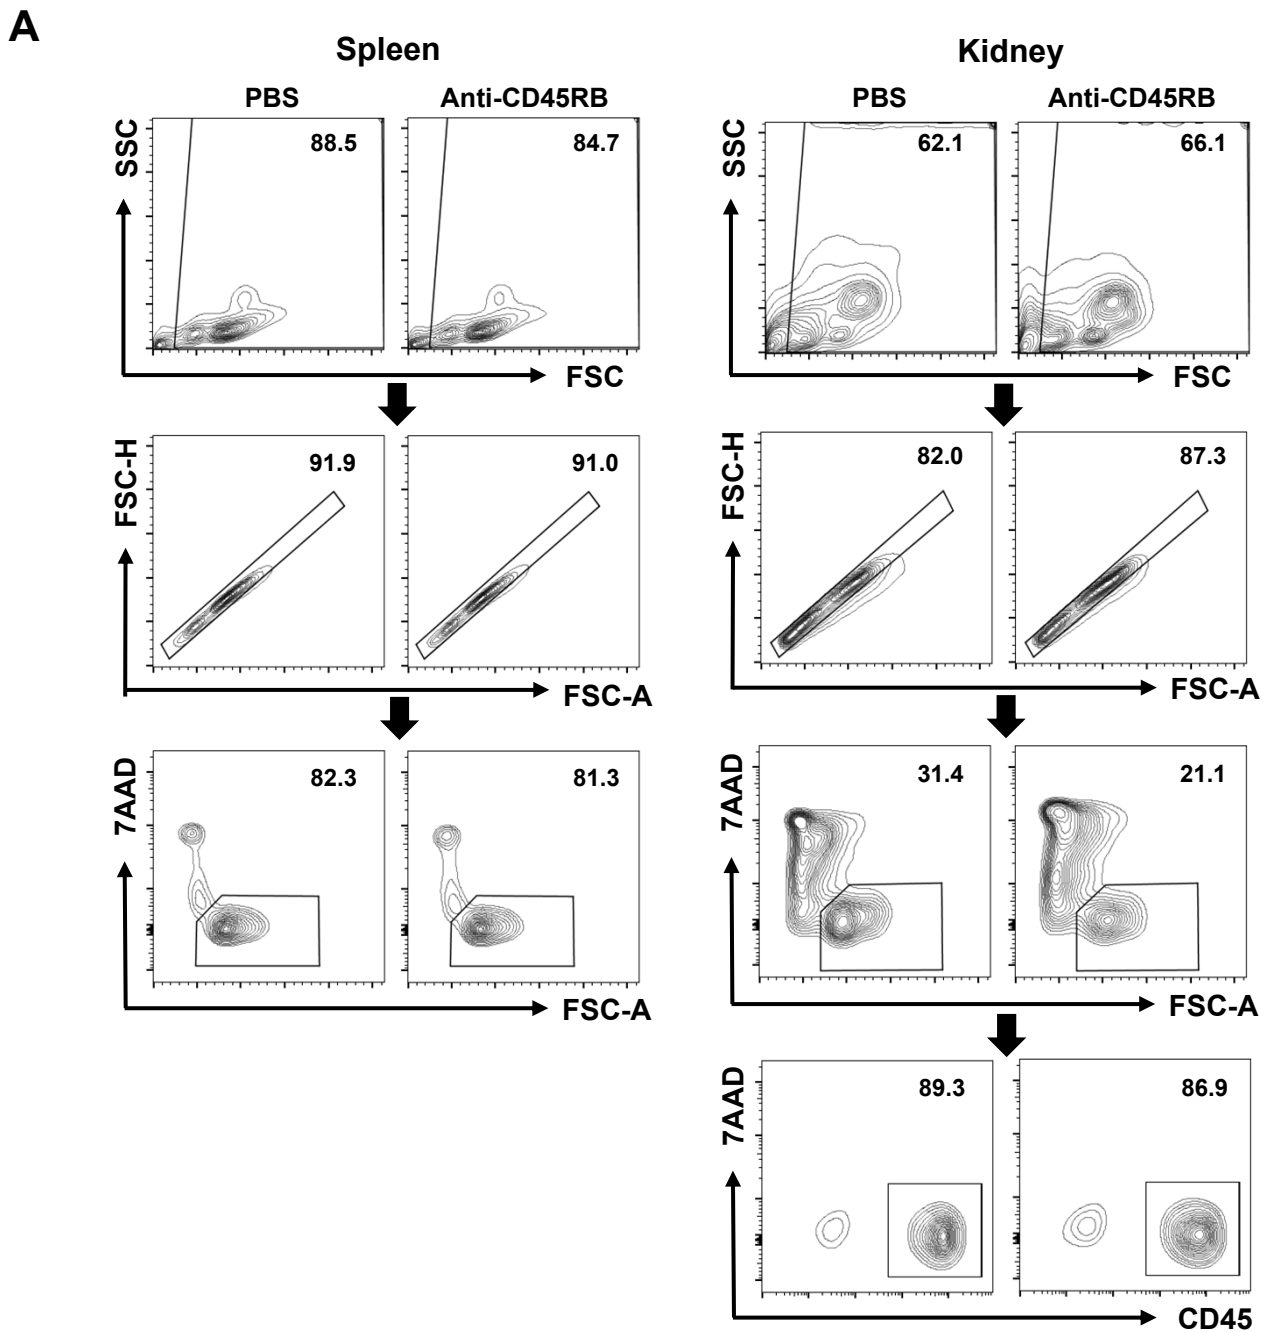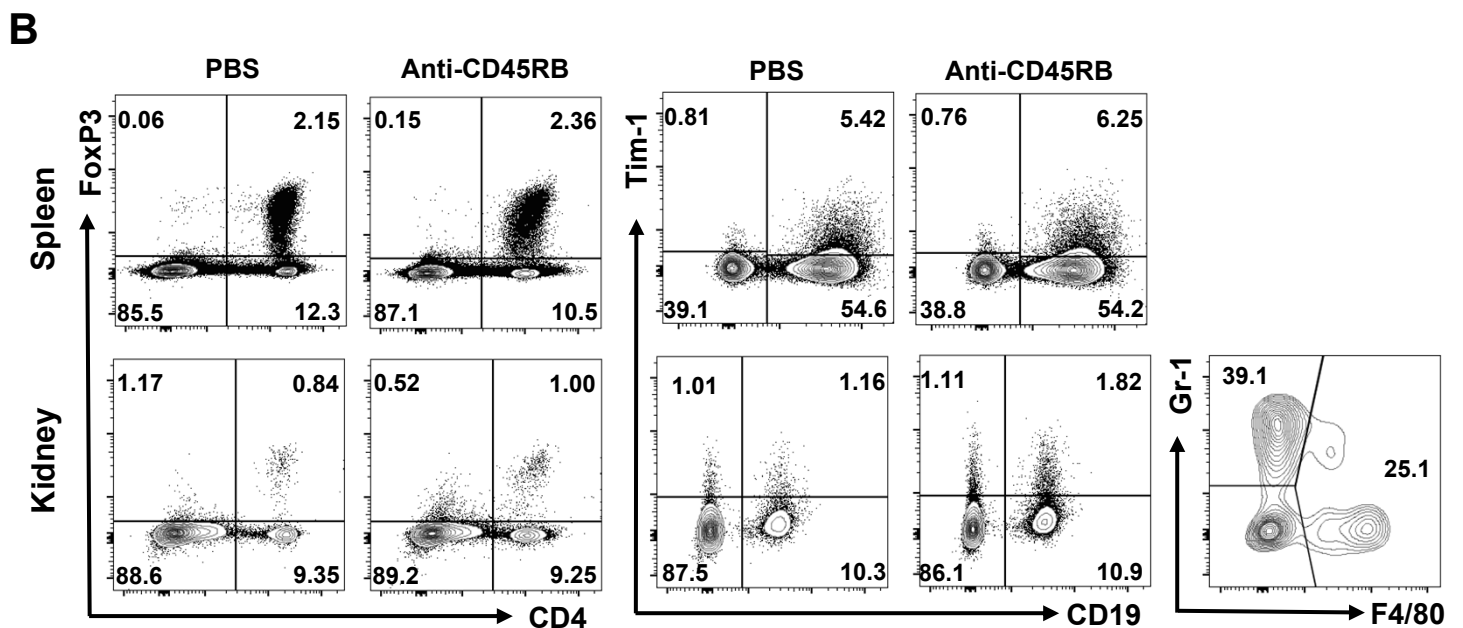

Supplemental Figure 1

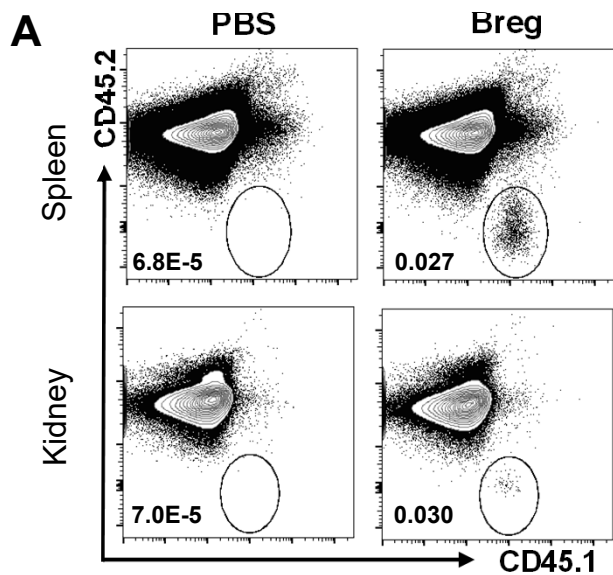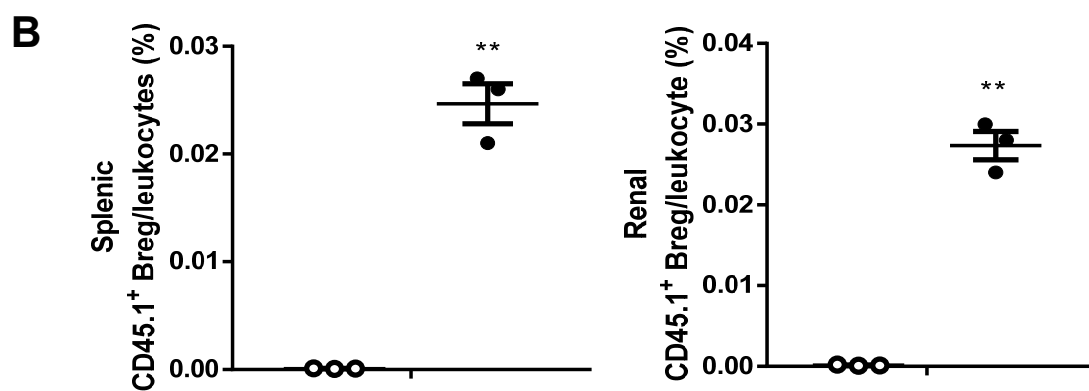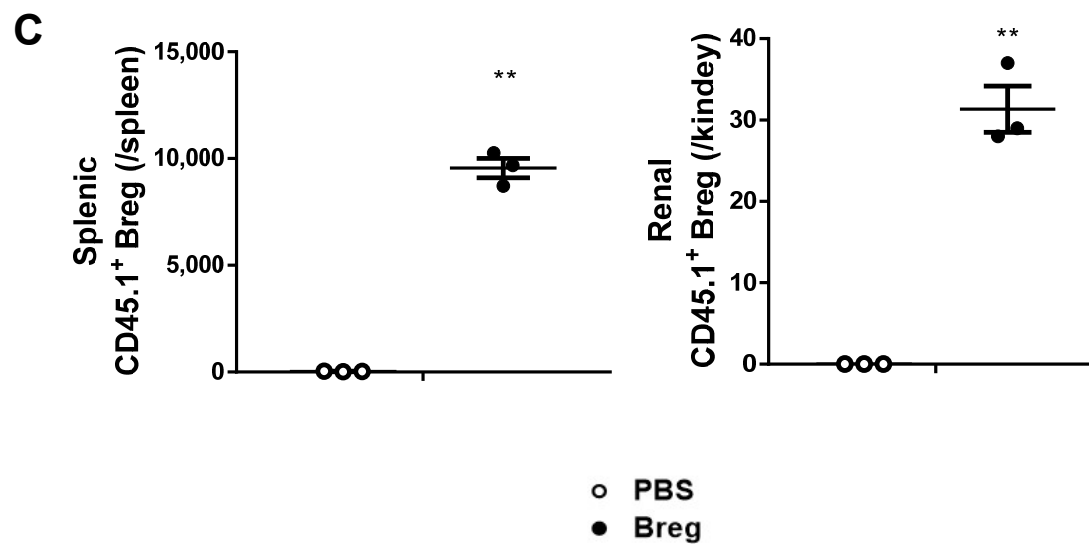

Supplemental Figure 2



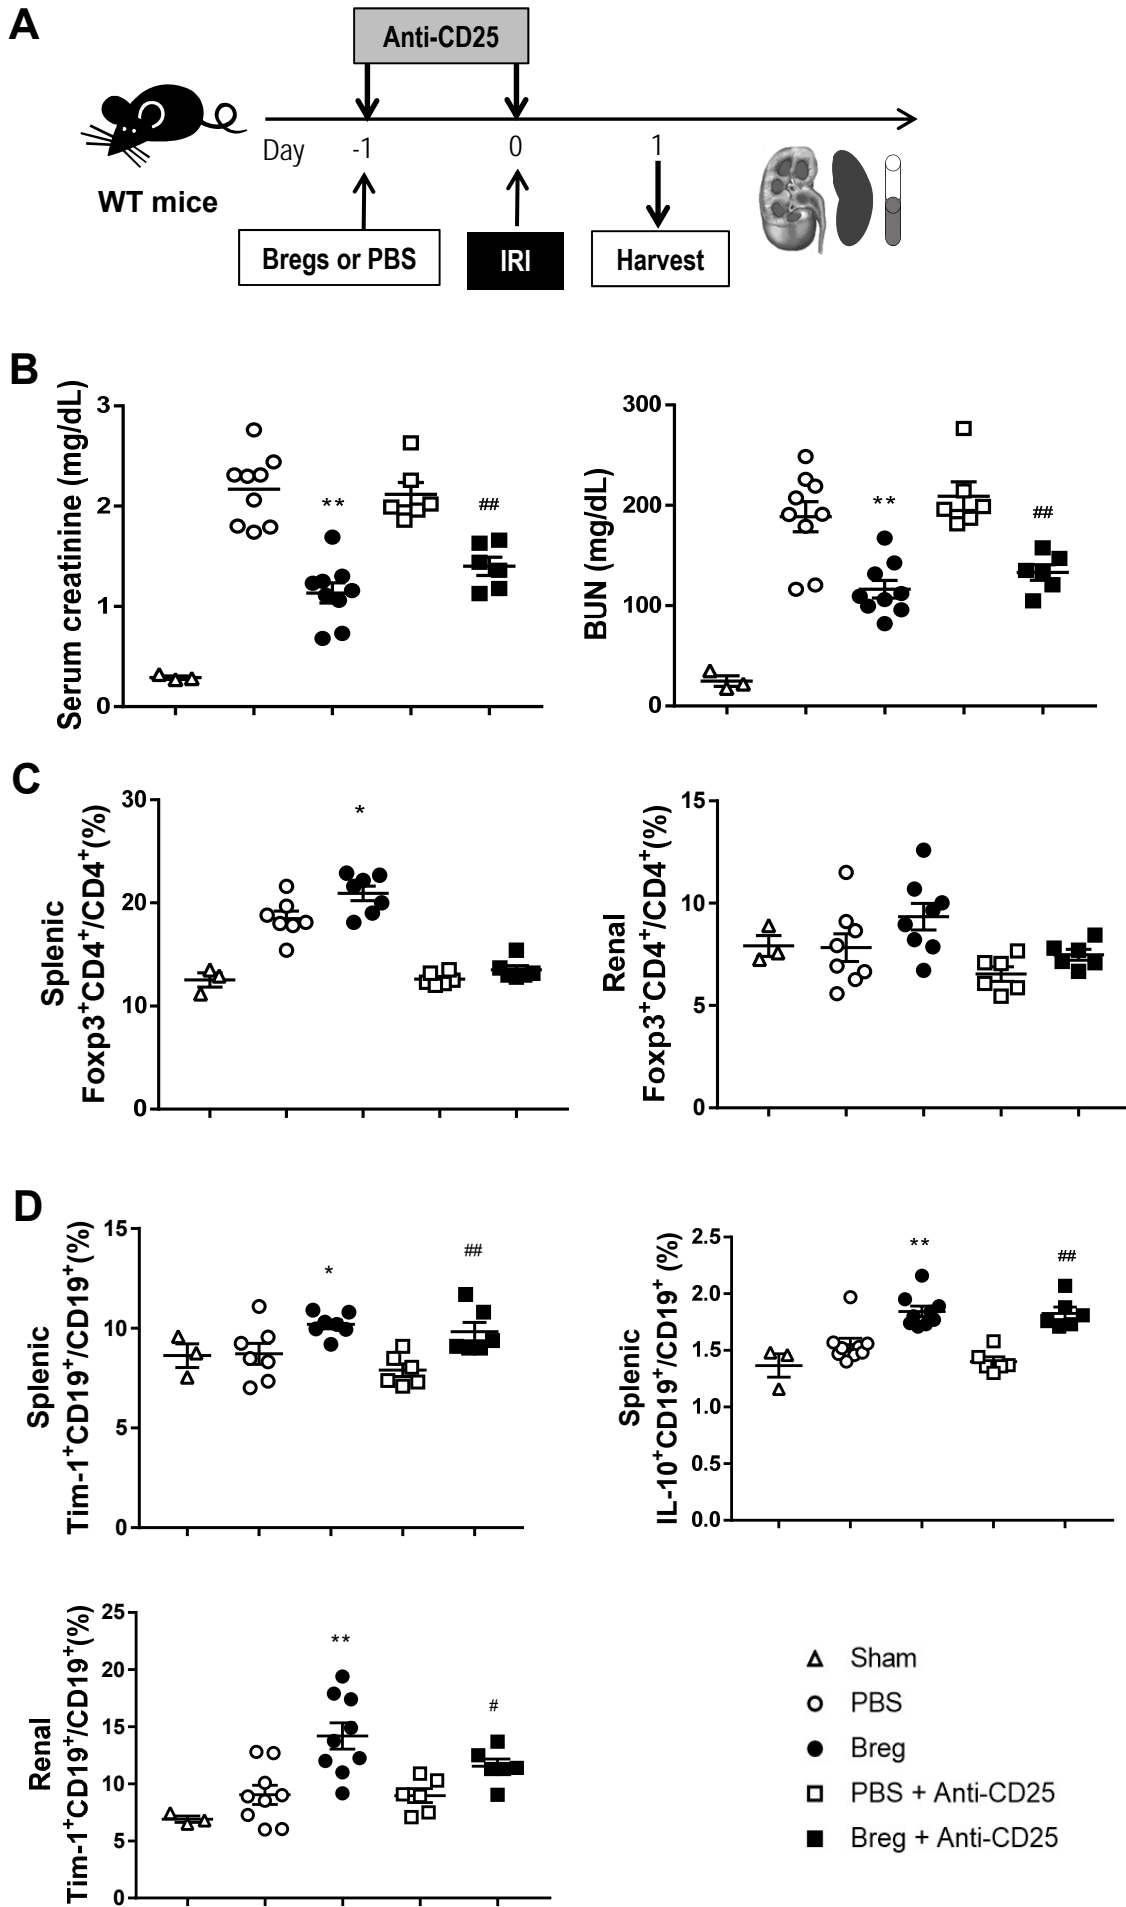

Supplemental Figure 3

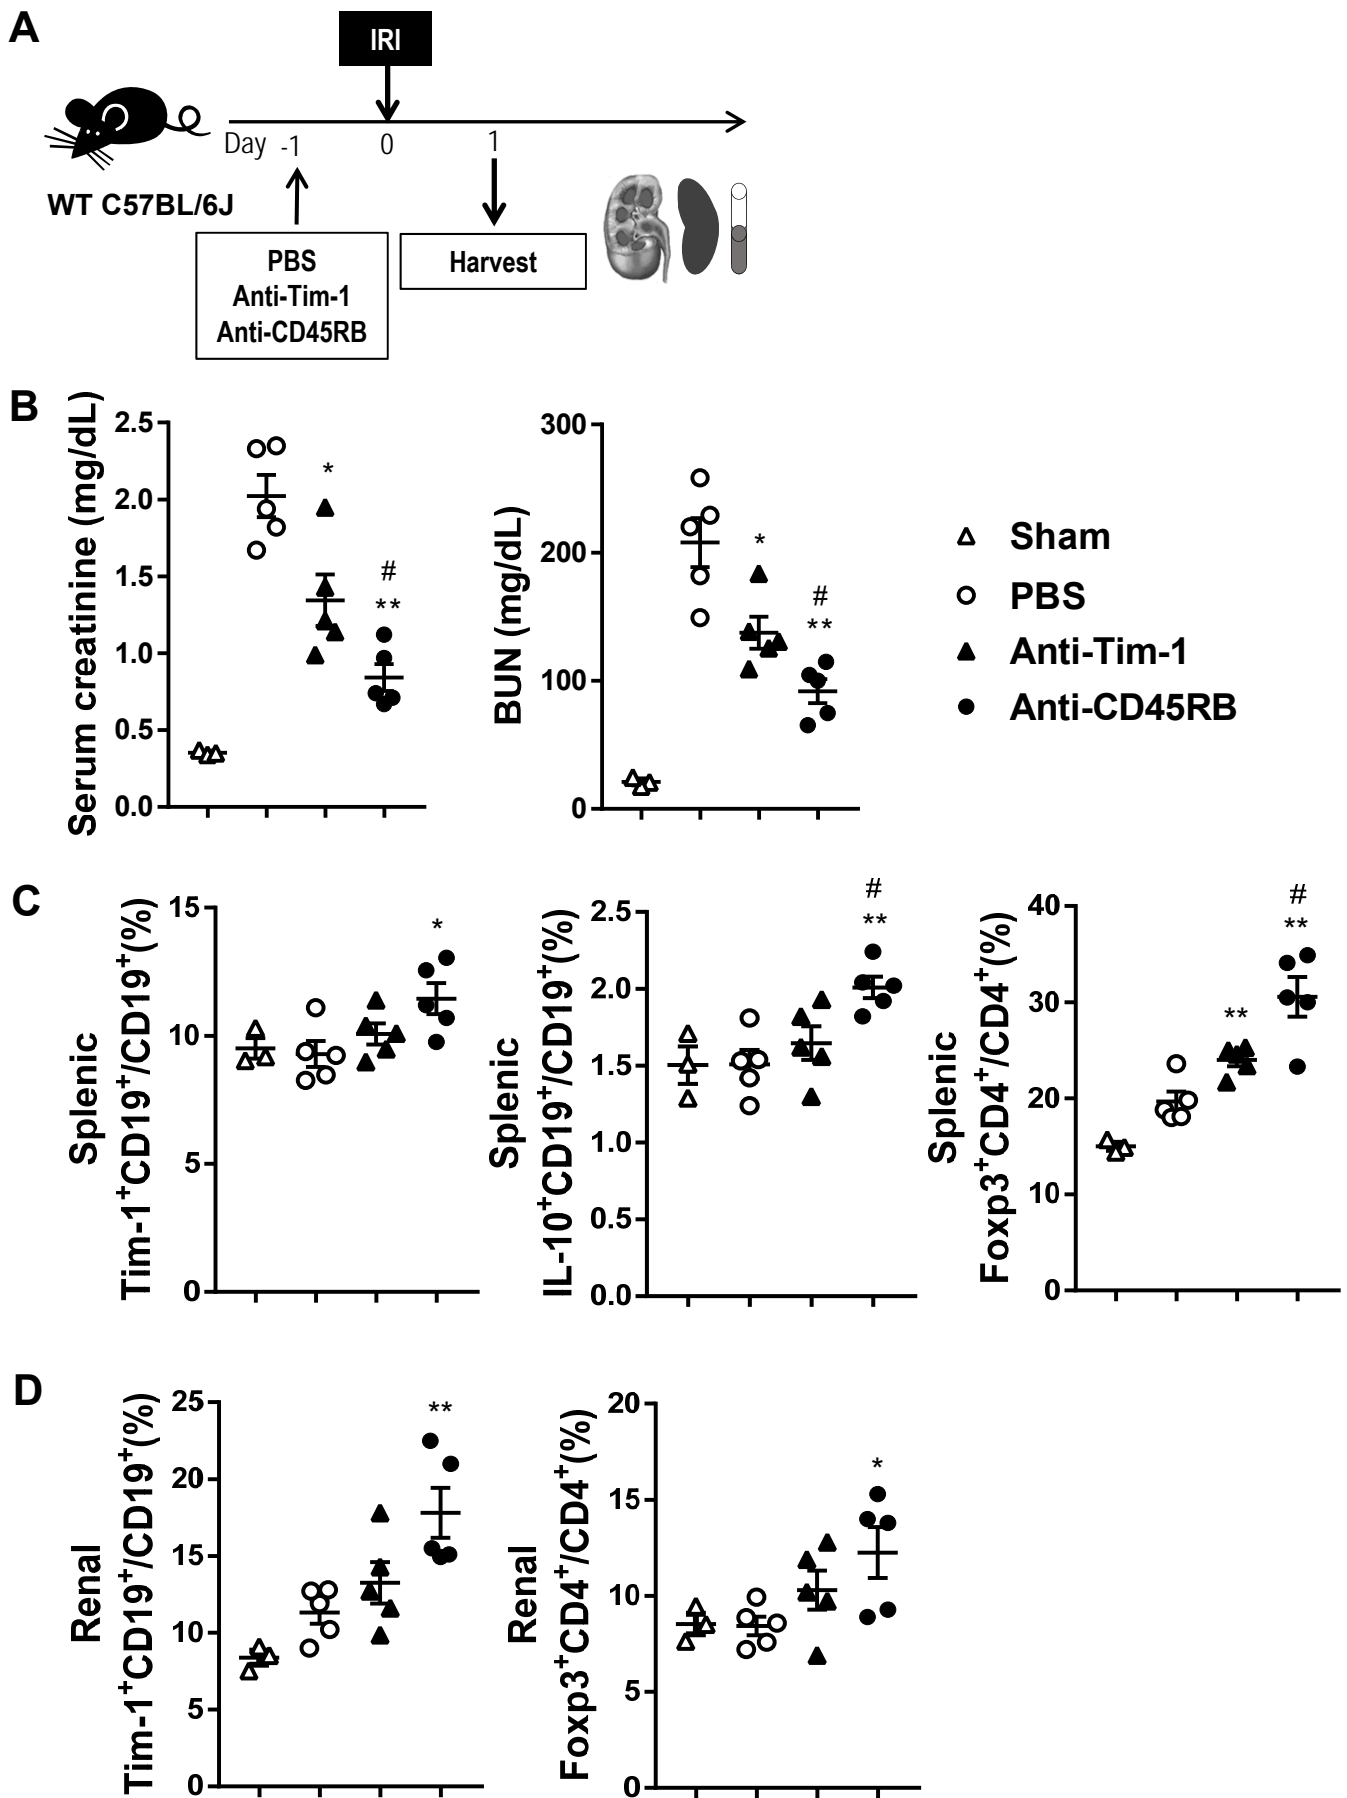

Supplemental Figure 4

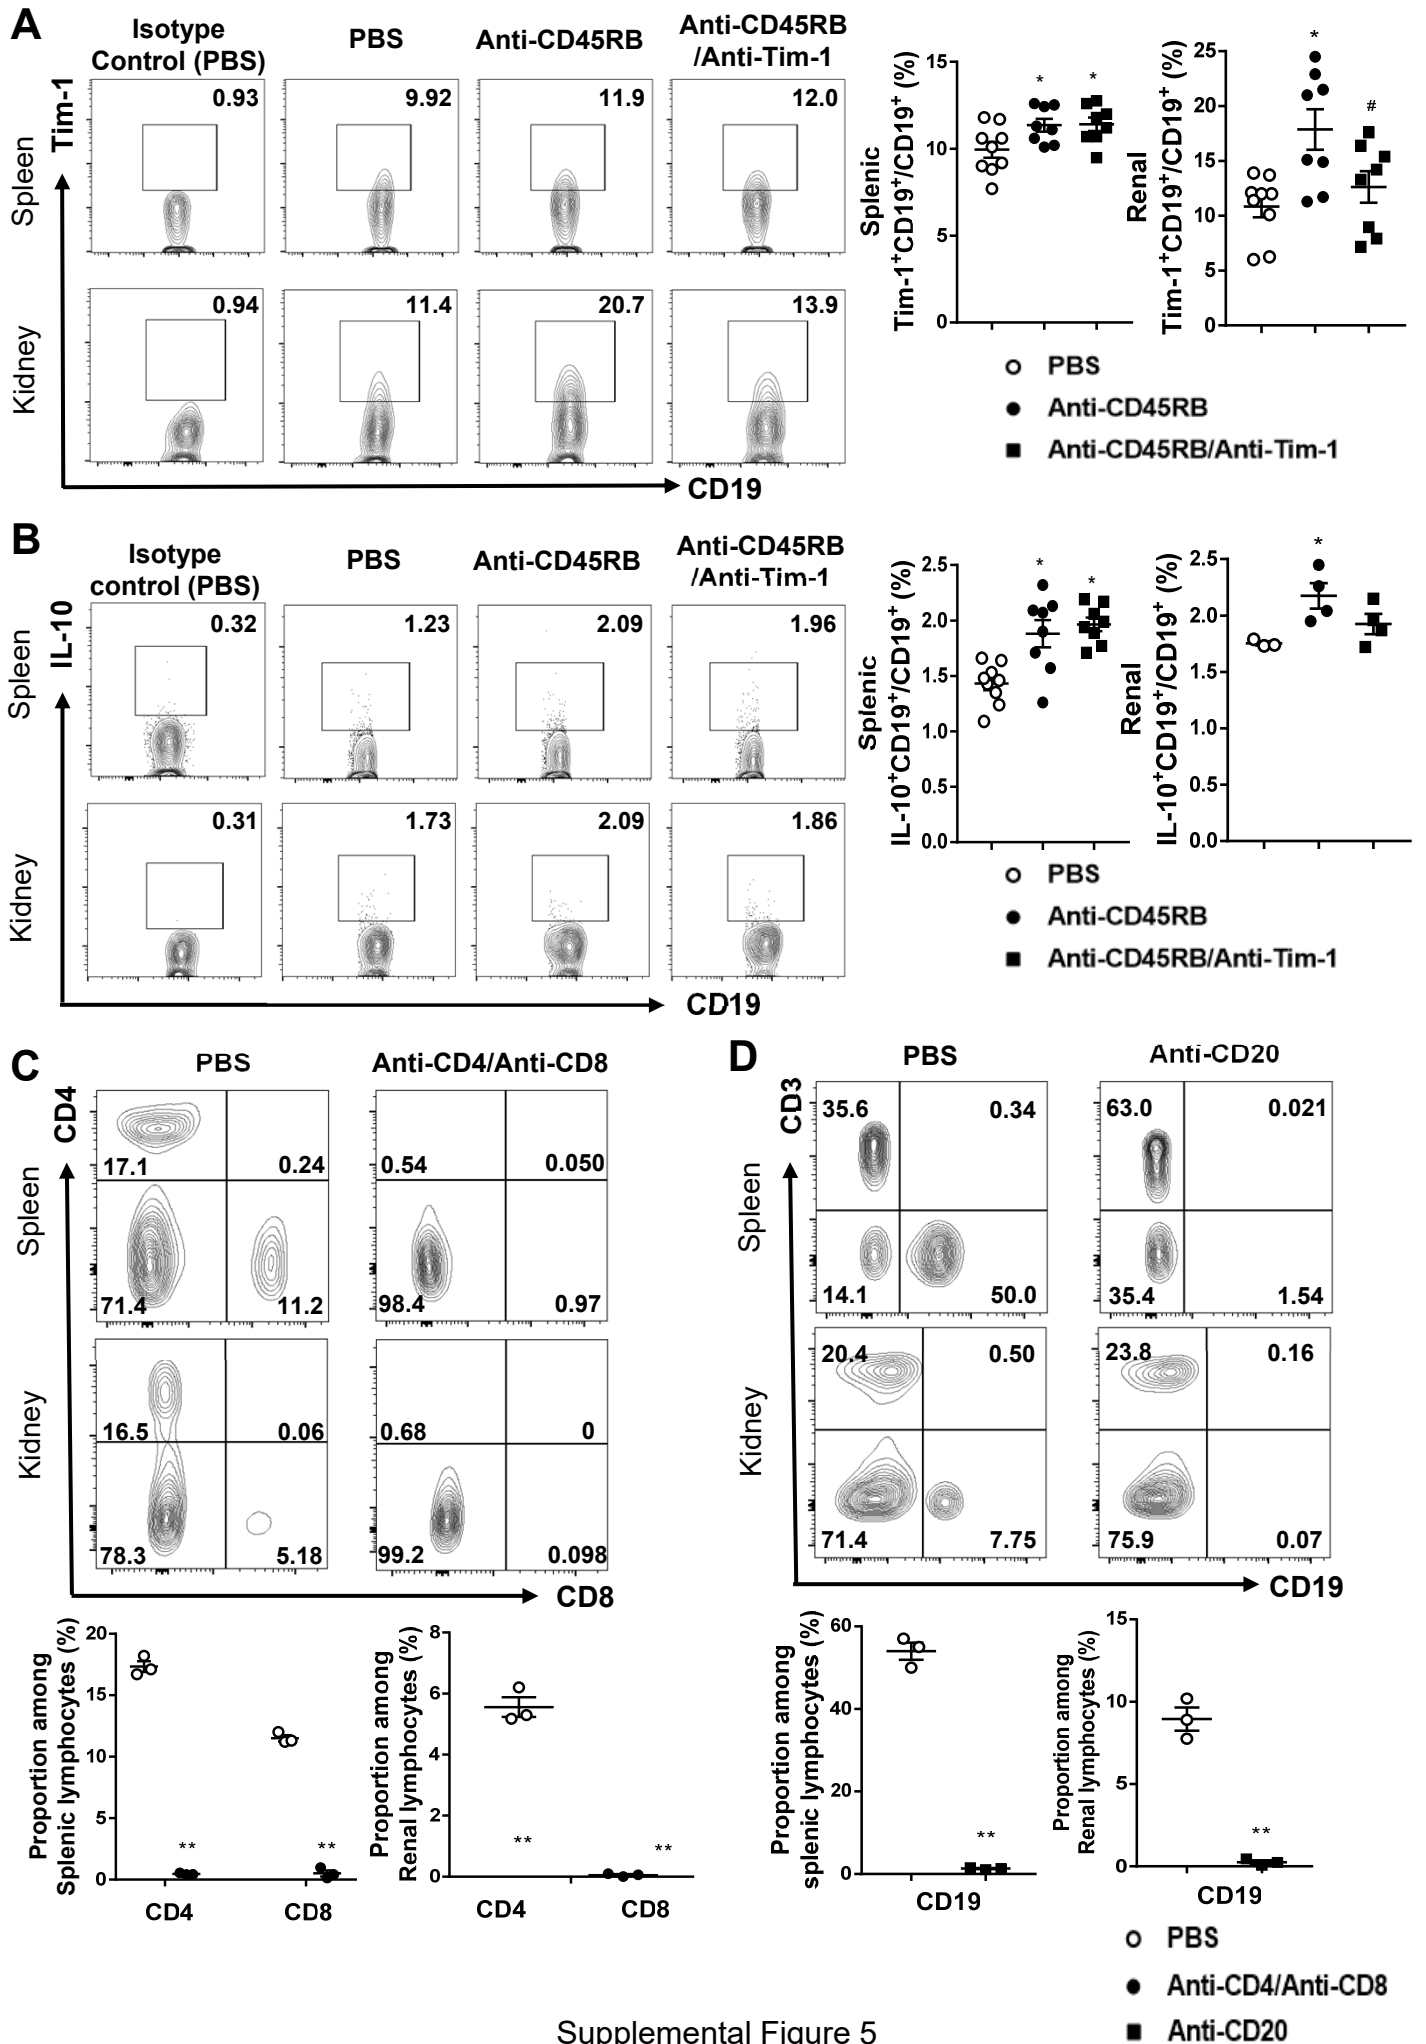

Supplemental Figure 5

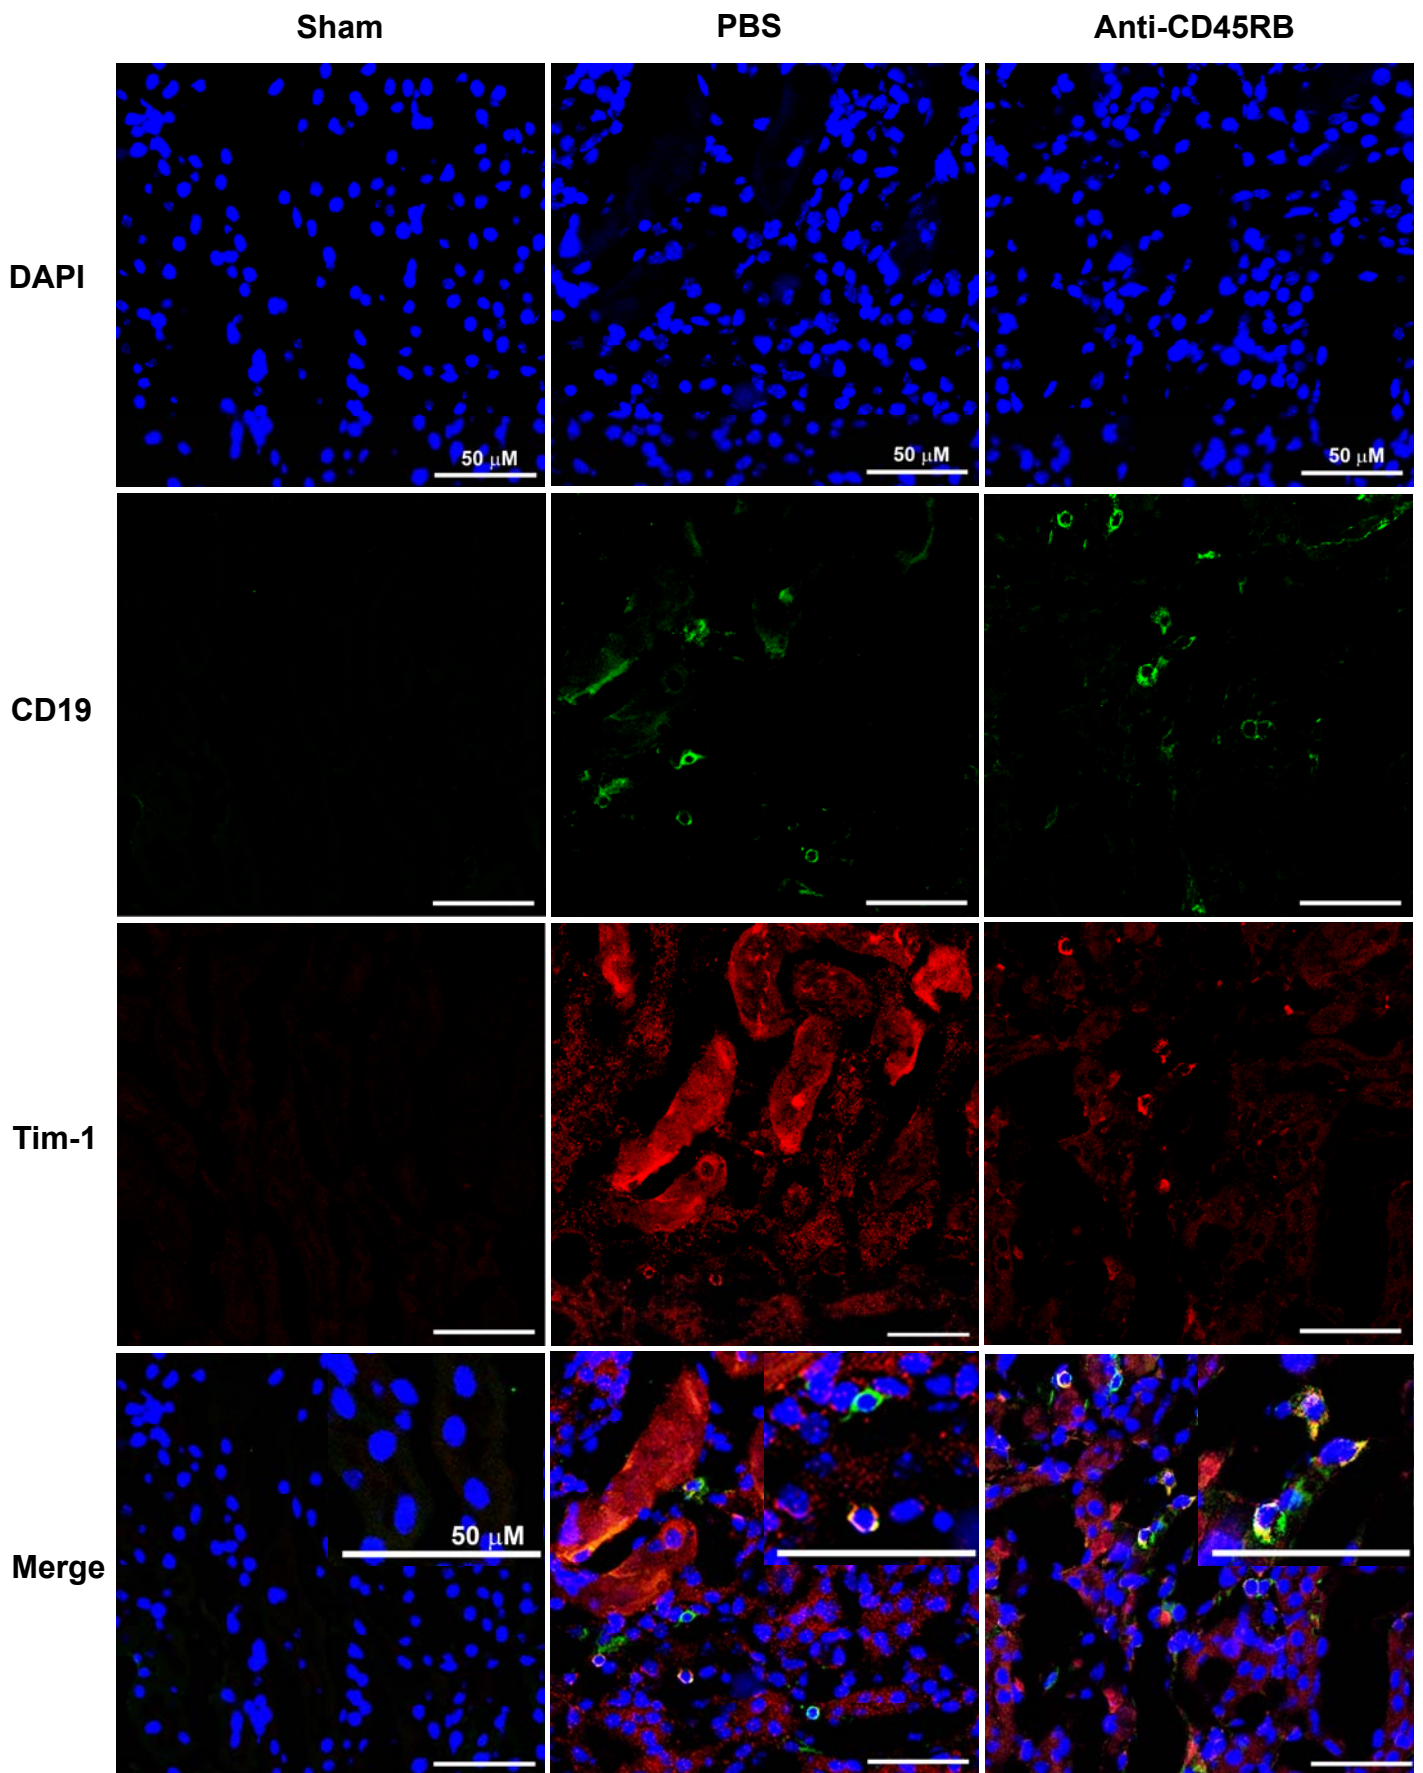

Supplemental Figure 6

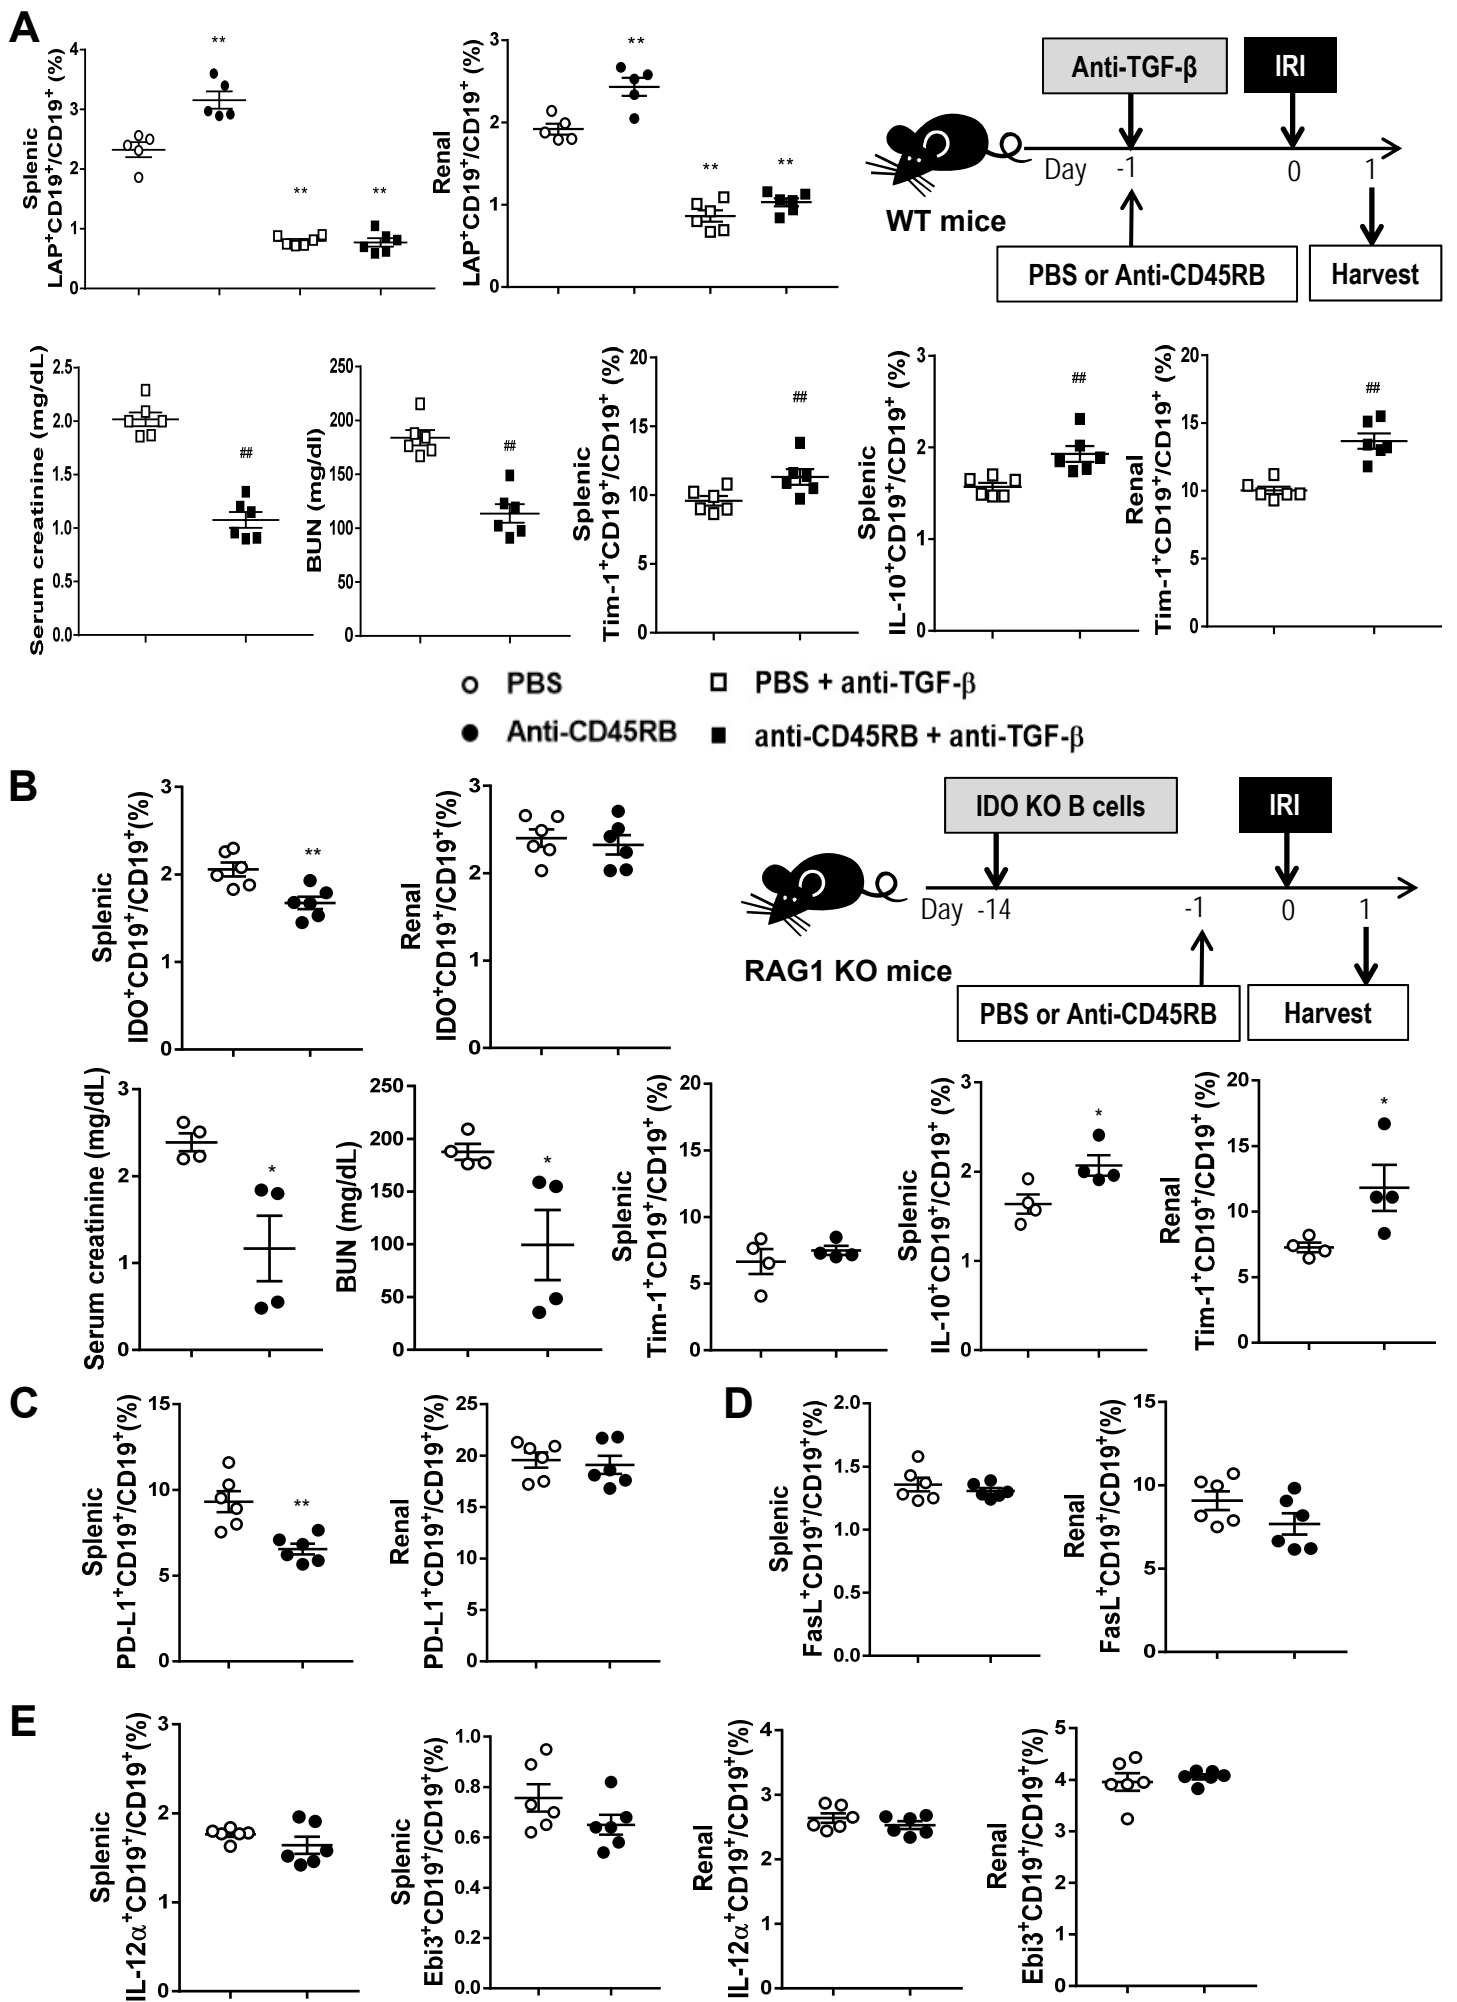

Supplemental Figure 7

## Copyright Transfer Agreement

The following transfer agreement must be signed by all of the authors and submitted through Manuscript Central before the Work can be published. No proxies are allowed. If the Work is not accepted by ASN or is withdrawn prior to acceptance by ASN, this transfer will be null and void.

In consideration of the publication of the Work, the undersigned Authors (herein after referred to as Author or Authors) transfer and assign to ASN and its successors and assigns all rights in the Work of whatsoever kind of nature, including those now or hereafter protected by the copyright laws of the United States and all foreign countries, as well as any renewal, extension, or reversion of copyright, now or hereinafter provided in any country. The Work is deemed to include all material submitted for publication and includes text, figures, tables, Author contact details and all supplementary material accompanying the Work.

By signing this form, each Author thus represents and warrants that he/she has made significant contributions to the Work and that he/she had full "freedom of investigation" during all phases of this Work as defined by the absence of external interests in any phase of the conduct of this Work.

Author represents and warrants that his/her contribution is an original Work not published elsewhere in whole or in part, except in abstract form, that he/she has full power to transfer and assign the Work, and that the Work contains no matter libelous or otherwise unlawful or which invades the right of privacy or which infringes on any property right.

Author represents and warrants that the Work has not been previously published and that if portions have been previously published, permission has been obtained for publication in ASN's publication, and the Author will submit a copy of the permission release and copy for credit lines with his or her Work.

Author shall indemnify and hold harmless ASN, its editors, officers, agents, directors and employees against any and all claims, losses, damages, liabilities, and expenses (including legal costs and expenses or actions in respect thereof) arising from any breach of this agreement, or ASN's publication of the Work.

ASN, in turn, grants to Author the royalty free right of re-publication in any book of which he or she is the Author or editor, the right to make oral presentation of the Work in any forum, and the right to make digital or hard copies of the Work for personal and noncommercial benefit, subject to the express condition that lawful notice of claim of copyright be given and as long as the Author does not sell or reproduce the Work or any part of it for commercial purposes (i.e. for monetary gain on the Author's own account or on that of a third party, or for indirect financial gain by a commercial entity.) These rights apply without needing to seek permission from ASN.

**MS ID # JASN-2018-10-1067**

**Submission Date** APRIL 30<sup>th</sup>, 2019

Jaeseok Yang



APRIL 30<sup>th</sup>, 2019

Corresponding Author's Printed Name

Signature

Date

Yeon-Mi Ryu



APRIL 30<sup>th</sup>, 2019

Co-Author's Printed Name

Signature

Date

Sang-Yeob Kim

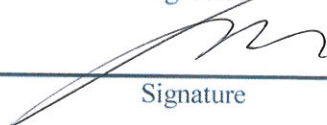

APRIL 30<sup>th</sup>, 2019

Co-Author's Printed Name

Signature

Date

Please use another page if there are more authors than lines provided above.
